# Supplementary material for: Casticin Inhibits AKR1C3 and Enhances Abiraterone Efficacy in Castration-Resistant Prostate Cancer
Source: Research Square preprint supplement (doi:10.21203/rs.3.rs-7046275/v1), 2025-07-11
Supplement: Supplementary file 1 [file 32786da41ac9d23afff6fc33.docx]

### Supplementary Information ###

The ligand–protein RMSD plots and interaction timelines from MD simulation replicates #2 and #3.


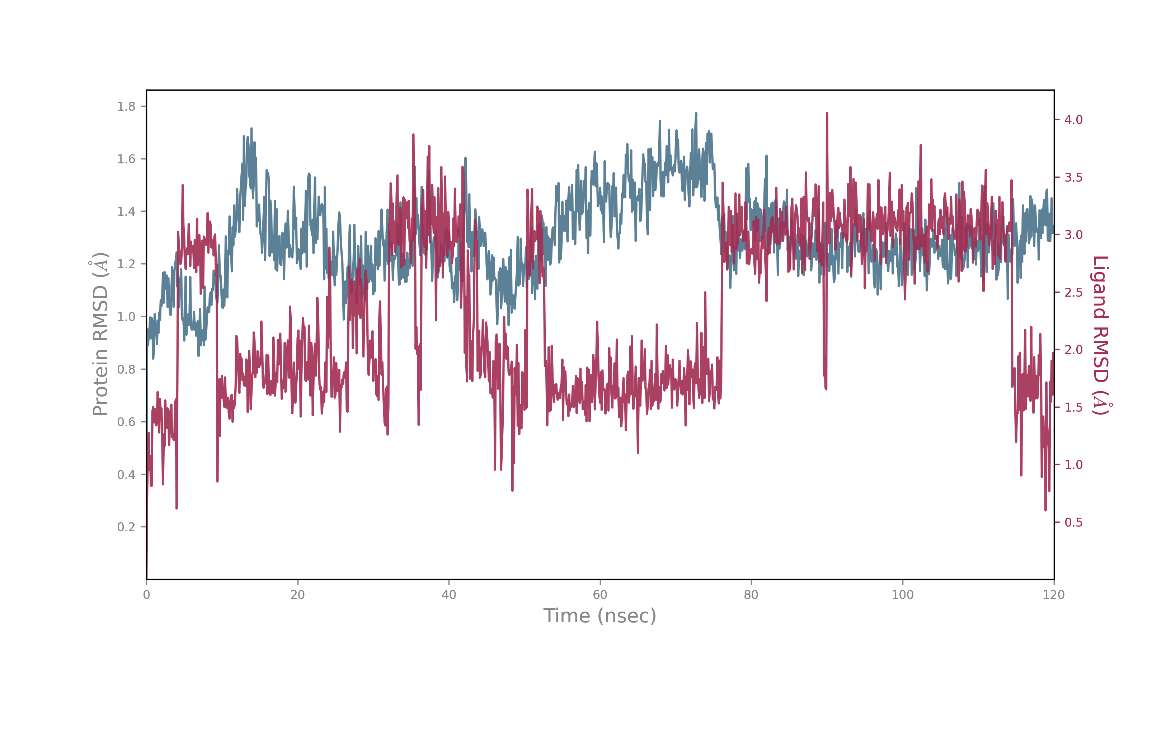


Figure S1. Protein and ligand RMSD values over the 120 ns MD simulation (replicate #2) of the CAS-AKR1C3 complex.


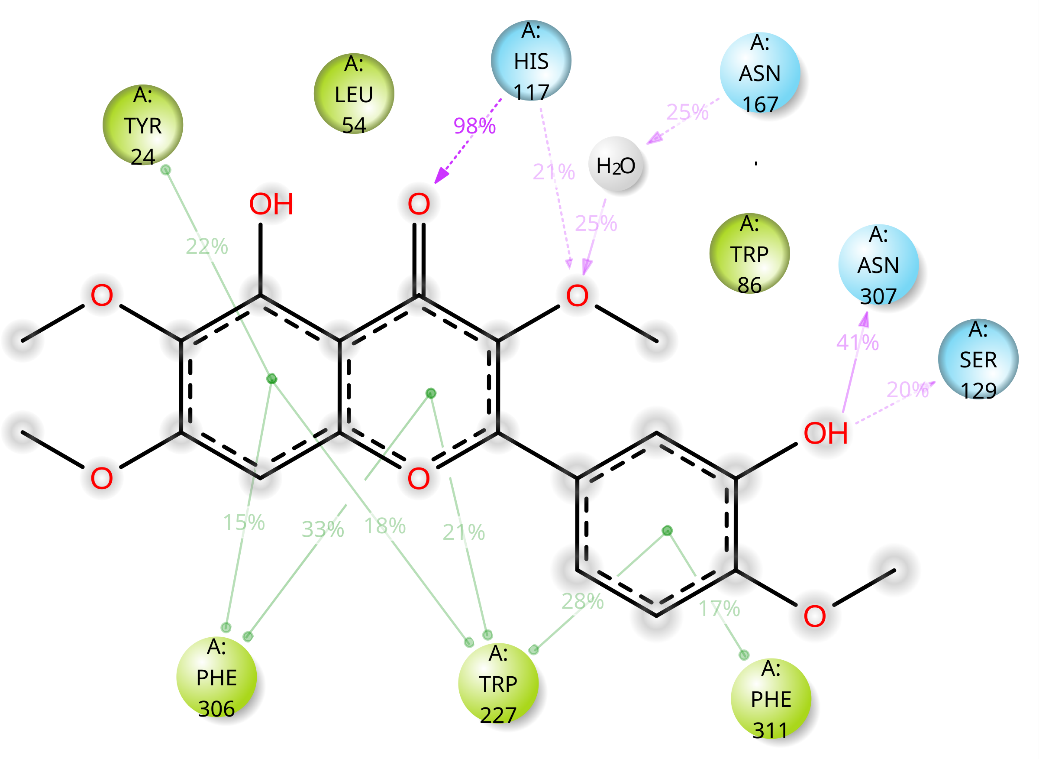


Figure S2. Interaction timeline for the 120 ns MD simulation (replicate #2) of the CAS-AKR1C3 complex.


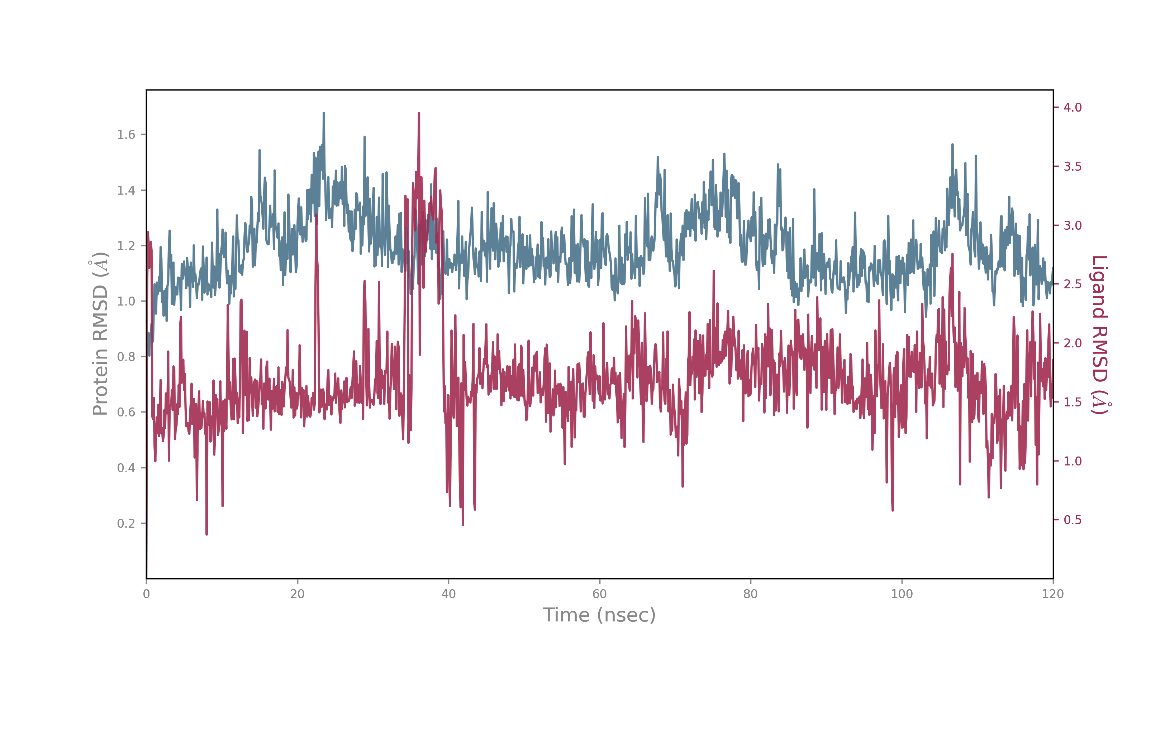


Figure S3. Protein and ligand RMSD values over the 120 ns MD simulation (replicate #3) of the CAS-AKR1C3 complex.


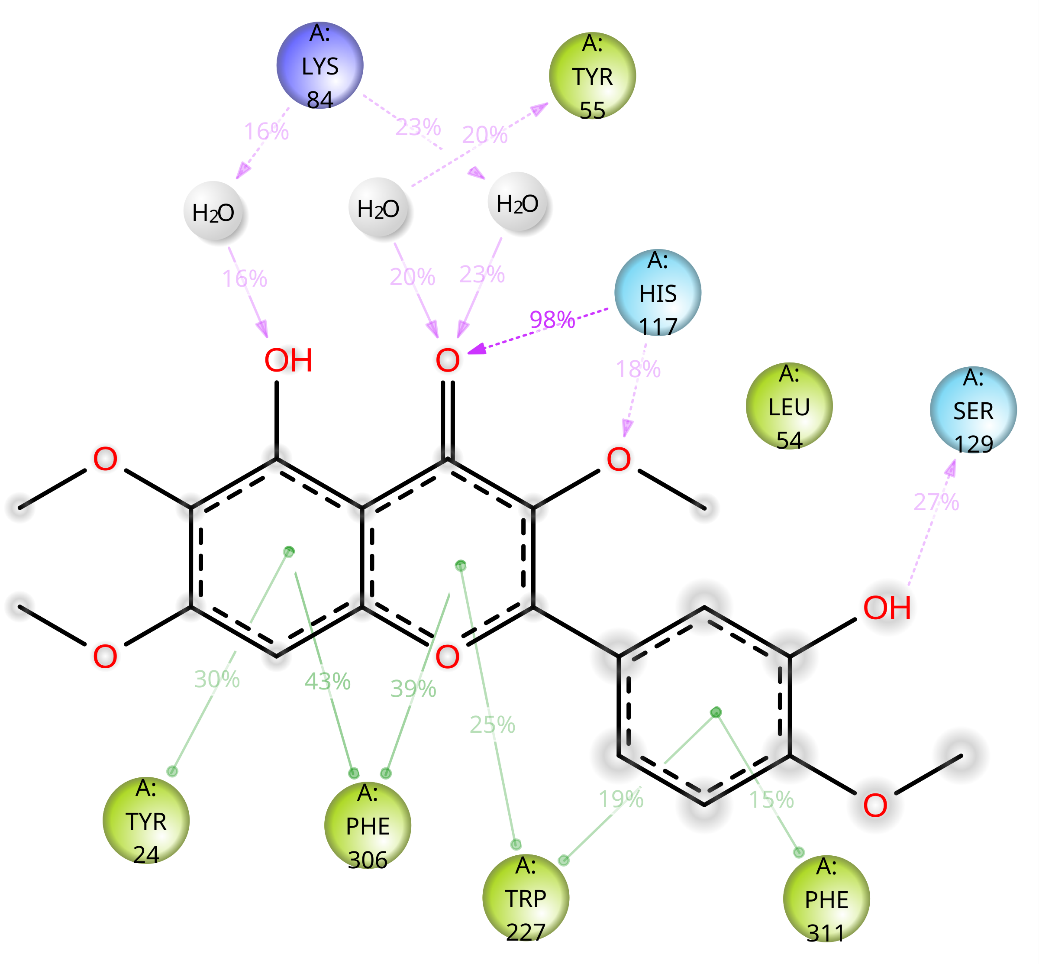


Figure S4. Interaction timeline for the 120 ns MD simulation (replicate #3) of the CAS-AKR1C3 complex.
